# Supplementary material
Source: MDPI journal article supplement (https://www.mdpi.com/2227-9040/10/12/527)
Supplement: s1 [file s1]

# **Microstructure and photoluminescence of $\text{ZrTiO}_4\text{:Eu}^{3+}$ phosphors: host-sensitized energy transfer and optical thermometry**

**Anheng Gu<sup>1,2</sup>, Guo-Hui Pan<sup>1,2,\*</sup>, Huajun Wu<sup>1,2</sup>, Liangliang Zhang<sup>1,2</sup>, Ligong Zhang<sup>1</sup>, Hao Wu<sup>1,2</sup>, Jiahua Zhang<sup>1,2,\*</sup>**

<sup>1</sup> *State Key Laboratory of Luminescence and Applications, Changchun Institute of Optics, Fine Mechanics and Physics, Chinese Academy of Sciences, 3888 Dong Nanhu Road, Changchun 130033, China*

<sup>2</sup> *Center of Materials Science and Optoelectronics Engineering, University of Chinese Academy of Sciences, Beijing 100049, China*

\* Correspondence: guohui.pan@aliyun.com, zhangjh@ciomp.ac.cn

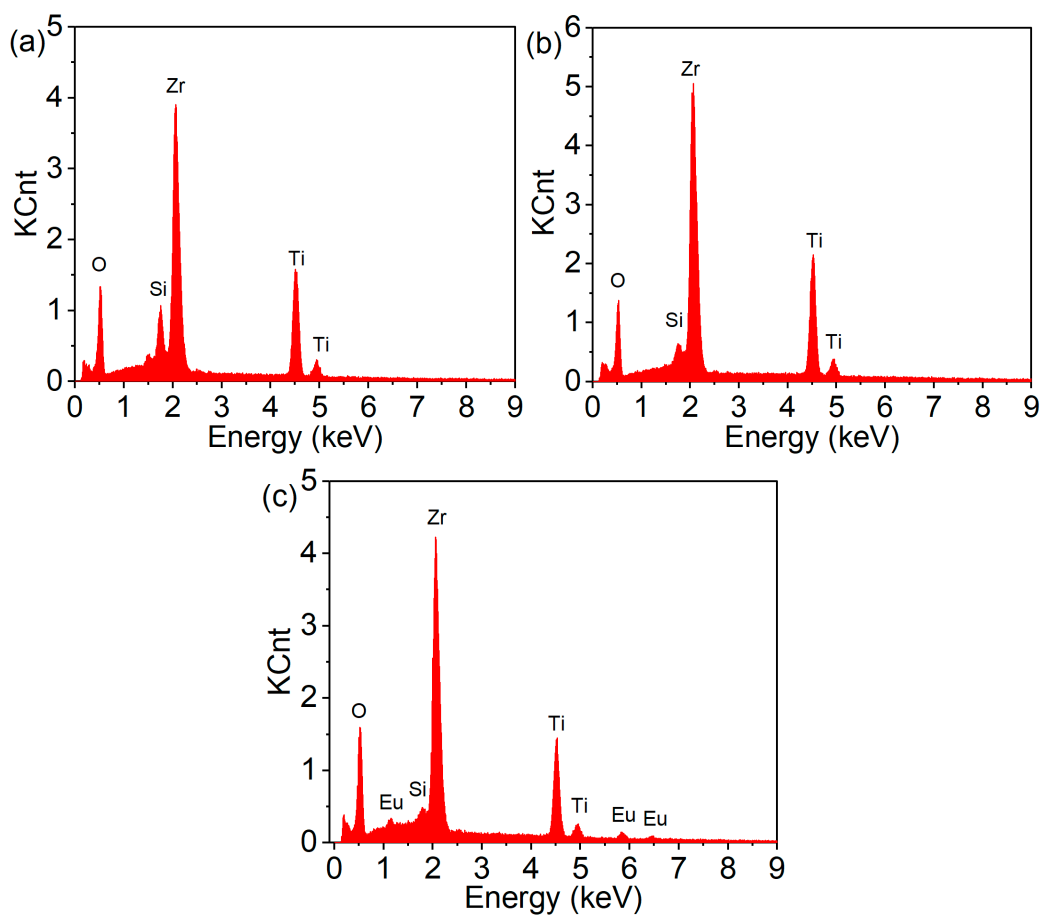

### Element analysis

| Samples                                        | Element (At%) |       |       |      |
|------------------------------------------------|---------------|-------|-------|------|
|                                                | O             | Zr    | Ti    | Eu   |
| $\text{ZrTiO}_4$                               | 65.66         | 16.68 | 17.66 | -    |
| $\text{Zr}_{0.99}\text{Eu}_{0.01}\text{TiO}_4$ | 60.20         | 19.04 | 20.57 | -    |
| $\text{Zr}_{0.95}\text{Eu}_{0.05}\text{TiO}_4$ | 66.23         | 15.87 | 16.86 | 1.04 |

**Figure S1.** EDS spectra of  $\text{Zr}_{1-x}\text{Eu}_x\text{TiO}_4$  ( $x = 0$ (a),  $0.01$  (b),  $0.05$ (c)) and the relative content of different elements in the samples derived from EDS analysis. The signals of  $\text{Eu}^{3+}$  was not detected at lower doping concentration ( $x \leq 0.01$ ); The Si signals detected are from the silicon substrate used to support the powdered samples.

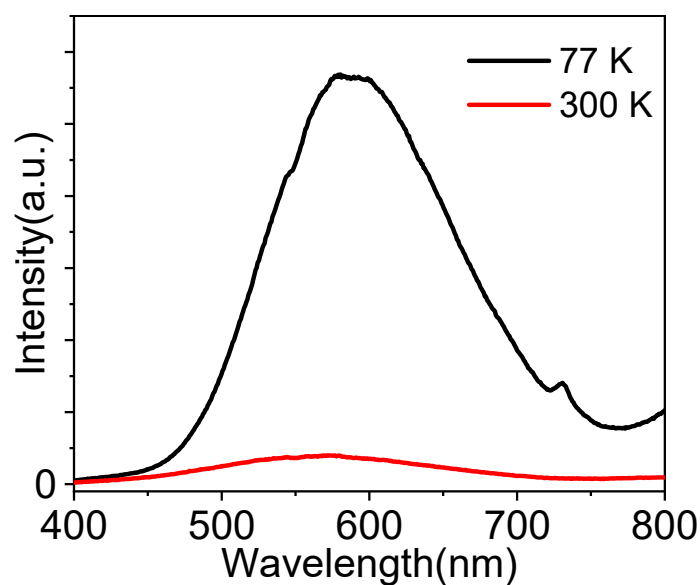

**Figure S2.** PL spectra of the ZrTiO<sub>4</sub> recorded at 77K and room temperature ( $\lambda_{\text{ex}}=340$  nm). The luminescence peaking at ~725 nm and the band above 800 nm are probably from crystal- field transitions of traces of transition metal impurities (e.g., Cr<sup>3+</sup>, Mn<sup>4+</sup>), which were commonly contained in the commercially available TiO<sub>2</sub> starting materials.

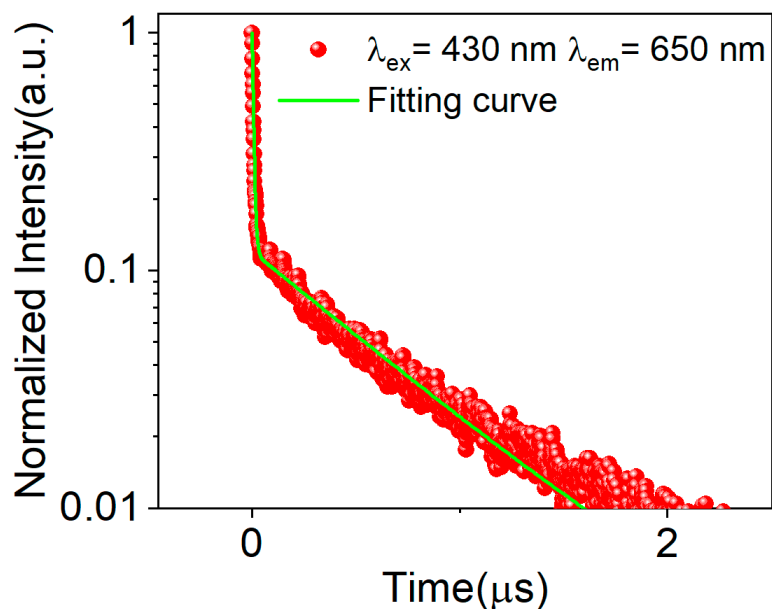

**Figure S3.** Fluorescence decay trace of 650 nm emission in ZrTiO<sub>4</sub> upon excitation at 430 nm at 77K.

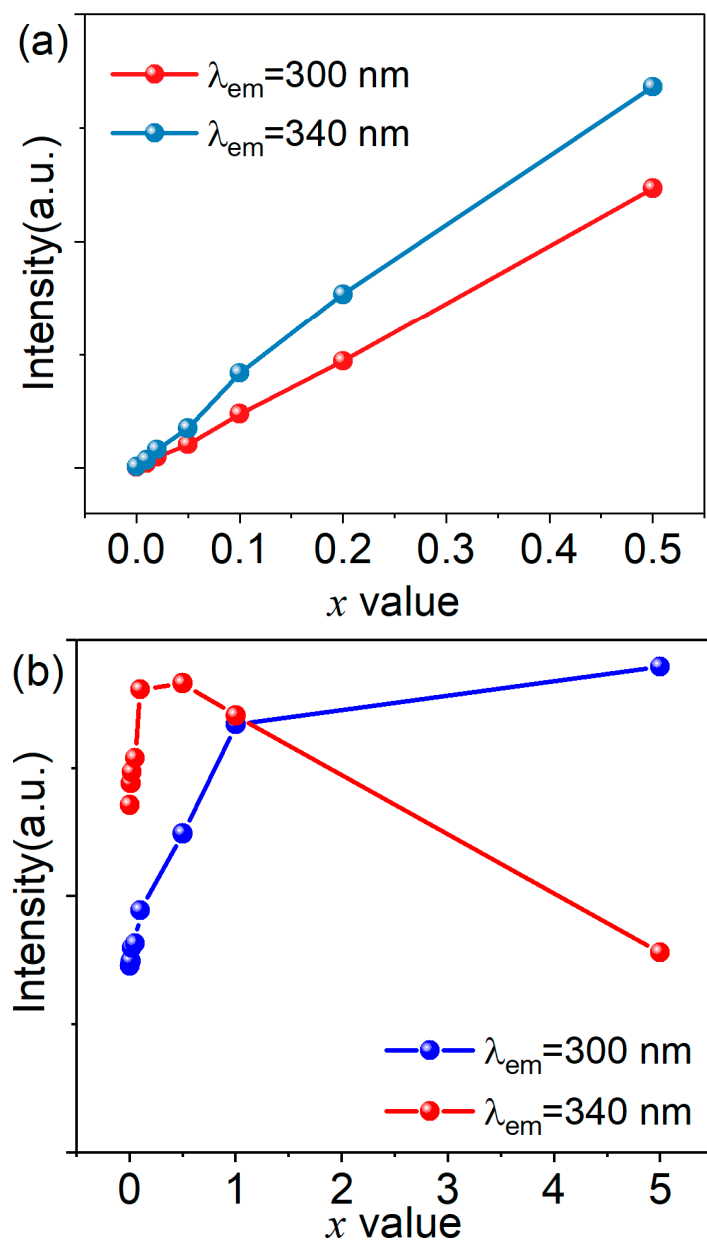

**Figure S4.** The luminescence intensity of 612 (a) 520 nm (b) emissions in  $\text{Zr}_{1-x}\text{Eu}_x\text{TiO}_4$  ( $x = 0.0001, 0.0005, 0.002, 0.005, 0.01, 0.05$ ) phosphors upon host excitation at 300 and 340 nm.

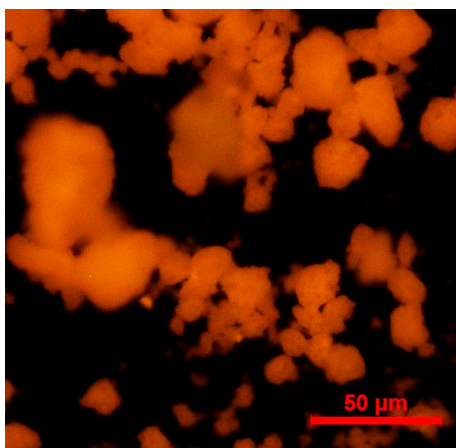

**Figure S5.** Fluorescence microscopy image (200×) of  $\text{Zr}_{0.99}\text{Eu}_{0.01}\text{TiO}_4$  under excitation of 340-370 nm.

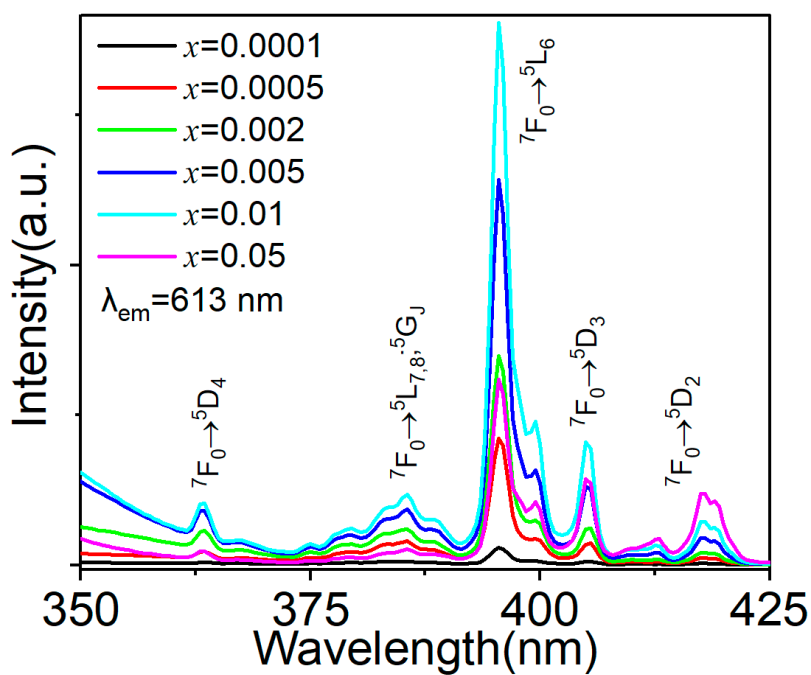

**Figure S6.** Excitation spectra of  $\text{Zr}_{1-x}\text{Eu}_x\text{TiO}_4$  ( $x = 0, 0.0001, 0.0005, 0.002, 0.005, 0.01, 0.05$ ) phosphors of  $\text{Eu}^{3+}$  emissions ( $\lambda_{\text{em}} = 613 \text{ nm}$ ).

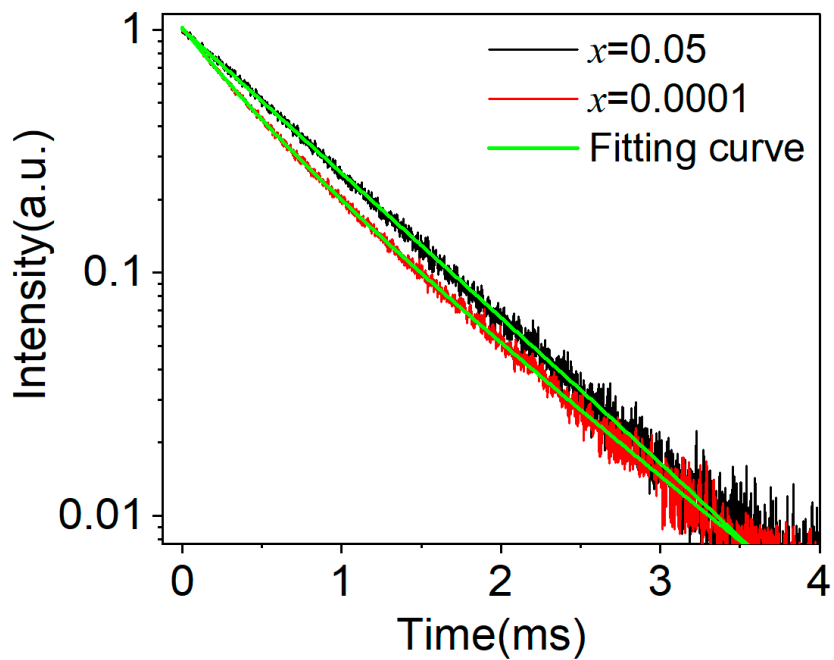

**Figure S7.** Fluorescence decay traces of  $^5D_0$  level  $\text{Eu}^{3+}$  ions in  $\text{Zr}_{1-x}\text{Eu}_x\text{TiO}_4$

( $x = 0.0001, 0.05$ ) ( $\lambda_{\text{ex}} = 534 \text{ nm}$   $\lambda_{\text{em}} = 613 \text{ nm}$ ) at 300K and fitting curves.

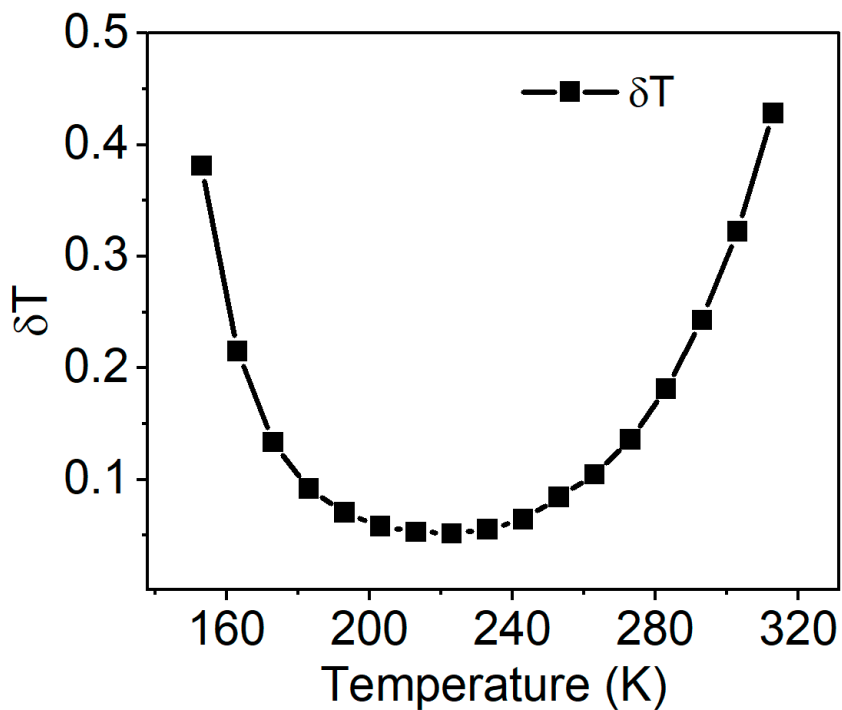

**Figure S8.** Temperature resolution  $\delta T$  of  $\text{Zr}_{1-x}\text{Eu}_x\text{TiO}_4$  ( $x = 0.0001$ )

temperature sensing material in the temperature range from 153K to 313K.

**Table S1** The excitation and emission wavelengths used in decay kinetics measurements, lifetime constants and percentage of two components, reduced chi-squared value for exponential and biexponential fitting and average lifetimes in different samples (Zr<sub>1-x</sub>Eu<sub>x</sub>TiO<sub>4</sub>)

| Sample                                                        | Temperature<br>(K) | Excitation<br>wavelength<br>(nm) | Emission<br>wavelength<br>(nm) | $\tau_1$      | $\tau_2$      | $\chi^2$ | Average<br>lifetime <sup>a</sup> |
|---------------------------------------------------------------|--------------------|----------------------------------|--------------------------------|---------------|---------------|----------|----------------------------------|
| ZrTiO <sub>4</sub>                                            | 300                | 300                              | 550                            | 3.99 ns       | 31.26 ns      | 0.996    | 20.6 ns                          |
| ZrTiO <sub>4</sub>                                            | 300                | 340                              | 600                            | 3.46 ns       | 29.88 ns      | 0.995    | 20.9 ns                          |
| ZrTiO <sub>4</sub>                                            | 77                 | 300                              | 550                            | 2.86 $\mu$ s  | 20.92 $\mu$ s | 0.987    | 15.6 $\mu$ s                     |
| ZrTiO <sub>4</sub>                                            | 77                 | 340                              | 550                            | 6.93 $\mu$ s  | 43.44 $\mu$ s | 0.991    | 37.2 $\mu$ s                     |
| ZrTiO <sub>4</sub>                                            | 77                 | 430                              | 650                            | 0.007 $\mu$ s | 0.60 $\mu$ s  | 0.993    | 0.55 $\mu$ s                     |
| Zr <sub>1-x</sub> Eu <sub>x</sub> TiO <sub>4</sub> (x=0.0001) | 300                | 534                              | 613                            | 0.35 ms       | 0.79 ms       | 0.999    | 0.69 ms                          |
| Zr <sub>1-x</sub> Eu <sub>x</sub> TiO <sub>4</sub> (x=0.05)   | 300                | 534                              | 613                            | 0.73 ms       | -             | 0.999    | 0.73 ms                          |

<sup>a</sup> Average lifetime was calculated from the equation of  $\bar{\tau} = \frac{A_1\tau_1^2 + A_2\tau_2^2}{A_1\tau_1 + A_2\tau_2}$
